# Supplementary material
Source: HighWire-hosted journal article supplement (http://www.qdcxjkg.com/highwire/filestream/114717/field_highwire_adjunct_files/0/ERJ-00150-2015_Supplement.pdf)

---

**Supplement Figure S1. Outline of Task Force Consensus Process**

---

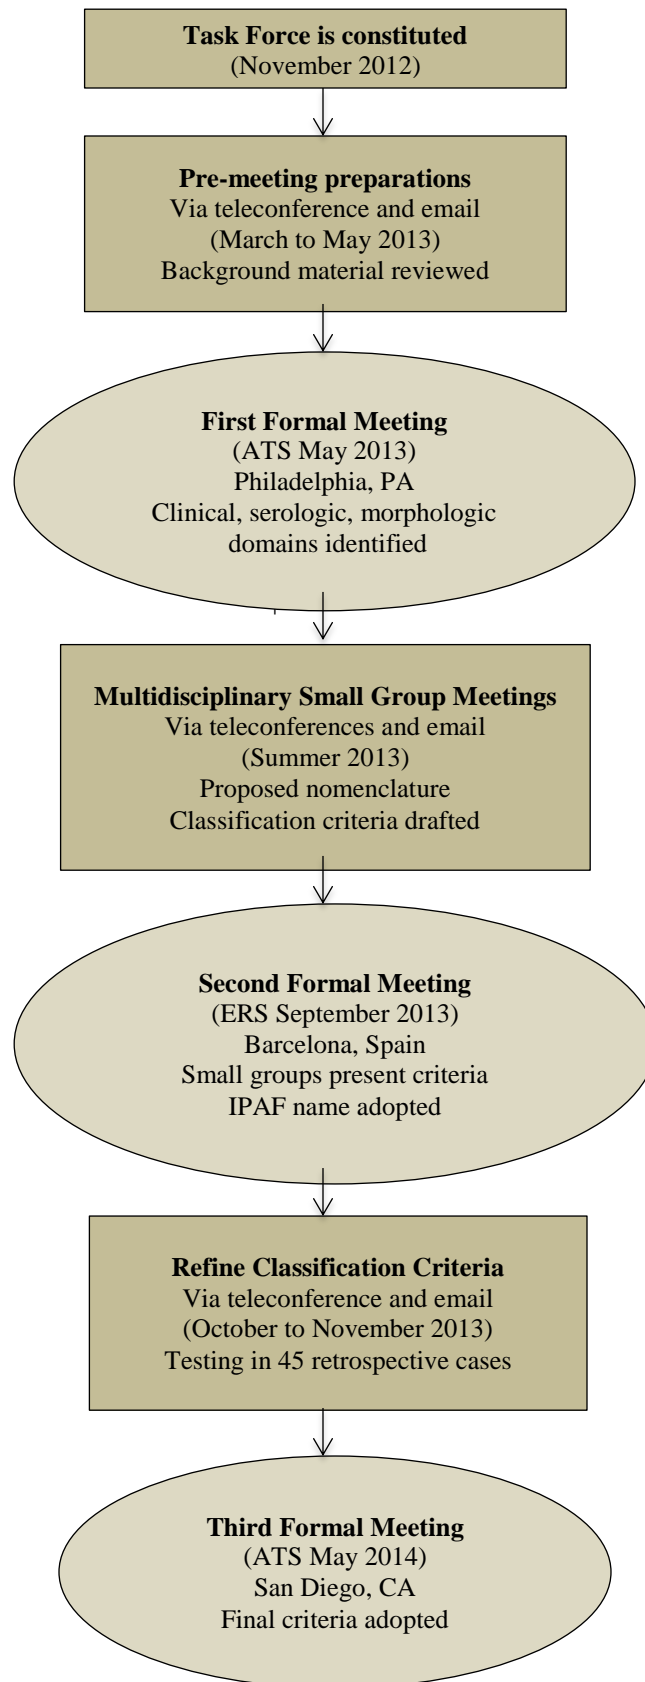

Supplement: ERJ-00150-2015_Supplement.pdf [file ERJ-00150-2015_Supplement.pdf]
